# Supplementary material for: Hearing Loss in Alzheimer’s Disease Is Associated with Altered Serum Lipidomic Biomarker Profiles
Source: PubMed Central journal article supplement (PMC7760745; doi:10.3390/cells9122556), 2020-11-28
Supplement: cells-09-02556-s001.pdf [file cells-09-02556-s001.pdf]

1 Supplemental Table 1: Listing of lipids in all empirically-derived sets from Barupal et al. 2019

| Lipid Set | Lipid Class             | Lipid ID      | Network Label | FullName    | AcylChainInformation   | Adduct                | RT        | MZ           |
|-----------|-------------------------|---------------|---------------|-------------|------------------------|-----------------------|-----------|--------------|
| Set -1    | Triacylglycerol         | UCD.Lipid.173 | TG 42:0       | TG (42:0)   | TG (14:0_14:0_14:0)    | [M+N H4] <sup>+</sup> | 9.4<br>3  | 740.6<br>763 |
| Set -1    | Triacylglycerol         | UCD.Lipid.174 | TG 40:0       | TG (40:0)   | TG(12:0_12:0_16:0)     | [M+N H4] <sup>+</sup> | 9.1       | 712.6<br>419 |
| Set -1    | Triacylglycerol         | UCD.Lipid.177 | TG 42:2       | TG (42:2)   | TG(12:0_12:0_18:2)     | [M+N H4] <sup>+</sup> | 8.4<br>67 | 736.6<br>446 |
| Set -1    | Triacylglycerol         | UCD.Lipid.179 | TG 44:0       | TG (44:0)   | TG(14:0_14:0_16:0)     | [M+N H4] <sup>+</sup> | 10.<br>13 | 768.7<br>037 |
| Set -1    | Triacylglycerol         | UCD.Lipid.180 | TG 44:1       | TG (44:1)   | TG(12:0_14:0_18:1)     | [M+N H4] <sup>+</sup> | 9.4<br>55 | 766.7<br>919 |
| Set -1    | Triacylglycerol         | UCD.Lipid.181 | TG 44:2       | TG (44:2)   |                        | [M+Na] <sup>+</sup>   | 9.0<br>33 | 769.6<br>316 |
| Set -1    | Triacylglycerol         | UCD.Lipid.182 | TG 46:0       | TG (46:0)   | TG(14:0_16:0_16:0)     | [M+N H4] <sup>+</sup> | 10.<br>38 | 796.7<br>389 |
| Set -1    | Triacylglycerol         | UCD.Lipid.183 | TG 46:1       | TG (46:1)   | TG(12:0_16:0_18:1)     | [M+N H4] <sup>+</sup> | 9.9<br>44 | 794.7<br>232 |
| Set -1    | Triacylglycerol         | UCD.Lipid.184 | TG 46:2       | TG (46:2)   | TG(12:0_16:1_18:1)     | [M+Na] <sup>+</sup>   | 9.5<br>12 | 797.6<br>63  |
| Set -1    | Triacylglycerol         | UCD.Lipid.185 | TG 46:3       | TG (46:3)   | TG(12:0_16:1_18:2)     | [M+Na] <sup>+</sup>   | 9.0<br>65 | 795.6<br>473 |
| Set -1    | Triacylglycerol         | UCD.Lipid.186 | TG 46:4<br>A  | TG (46:4) A |                        | [M+Na] <sup>+</sup>   | 8.8       | 793.6<br>322 |
| Set -1    | Triacylglycerol         | UCD.Lipid.187 | TG 48:0       | TG (48:0)   | TG(16:0_16:0_16:0)     | [M+N H4] <sup>+</sup> | 10.<br>81 | 824.7<br>702 |
| Set -1    | Triacylglycerol         | UCD.Lipid.188 | TG 48:1       | TG (48:1)   | TG(14:0_16:0_18:1)     | [M+N H4] <sup>+</sup> | 10.<br>4  | 822.7<br>545 |
| Set -1    | Triacylglycerol         | UCD.Lipid.189 | TG 48:2       | TG (48:2)   | TG(14:0_16:0_18:2)     | [M+N H4] <sup>+</sup> | 9.9<br>93 | 820.7<br>389 |
| Set -1    | Triacylglycerol         | UCD.Lipid.192 | TG 49:0       | TG (49:0)   | TG(16:0_16:0_17:0)     | [M+N H4] <sup>+</sup> | 10.<br>94 | 838.7<br>858 |
| Set -1    | Triacylglycerol         | UCD.Lipid.193 | TG 49:1       | TG (49:1)   | TG(15:0_16:0_18:1)     | [M+N H4] <sup>+</sup> | 10.<br>6  | 836.7<br>702 |
| Set -1    | Triacylglycerol         | UCD.Lipid.194 | TG 49:2       | TG (49:2)   | TG(15:0_16:0_18:2)     | [M+N H4] <sup>+</sup> | 10.<br>18 | 834.7<br>545 |
| Set -1    | Triacylglycerol         | UCD.Lipid.196 | TG 50:0       | TG (50:0)   | TG(16:0_16:0_18:0)     | [M+N H4] <sup>+</sup> | 11.<br>21 | 852.8<br>015 |
| Set -1    | Triacylglycerol         | UCD.Lipid.197 | TG 50:1       | TG (50:1)   | TG(16:0_16:0_18:1)     | [M+N H4] <sup>+</sup> | 10.<br>82 | 850.7<br>858 |
| Set -1    | Triacylglycerol         | UCD.Lipid.198 | TG 50:2       | TG (50:2)   | TG(16:0_16:1_18:1)     | [M+N H4] <sup>+</sup> | 10.<br>42 | 848.7<br>702 |
| Set -1    | Triacylglycerol         | UCD.Lipid.202 | TG 50:6       | TG (50:6)   | TG(14:0_16:1_20:5)     | [M+Na] <sup>+</sup>   | 9.1<br>8  | 845.6<br>599 |
| Set -1    | Triacylglycerol         | UCD.Lipid.203 | TG 51:1       | TG (51:1)   | TG(16:0_17:0_18:1)     | [M+N H4] <sup>+</sup> | 10.<br>96 | 864.8<br>015 |
| Set -1    | Triacylglycerol         | UCD.Lipid.208 | TG 52:0       | TG (52:0)   | TG(16:0_18:0_18:0)     | [M+N H4] <sup>+</sup> | 11.<br>58 | 880.8<br>328 |
| Set -1    | Triacylglycerol         | UCD.Lipid.209 | TG 52:1       | TG (52:1)   | TG(16:0_18:0_18:1)     | [M+N H4] <sup>+</sup> | 11.<br>22 | 878.8<br>171 |
| Set -1    | Triacylglycerol         | UCD.Lipid.215 | TG 53:1       | TG (53:1)   | TG(17:0_18:0_18:1)     | [M+N H4] <sup>+</sup> | 11.<br>35 | 892.8<br>328 |
| Set -1    | Triacylglycerol         | UCD.Lipid.220 | TG 54:0       | TG (54:0)   | TG(18:0_18:0_18:0)     | [M+N H4] <sup>+</sup> | 11.<br>92 | 908.8<br>576 |
| Set -1    | Triacylglycerol         | UCD.Lipid.221 | TG 54:1       | TG (54:1)   | TG(18:0_18:0_18:1)     | [M+N H4] <sup>+</sup> | 11.<br>58 | 906.8<br>484 |
| Set -1    | Triacylglycerol         | UCD.Lipid.229 | TG 56:2       | TG (56:2)   | TG(18:1_18:1_20:0)     | [M+N H4] <sup>+</sup> | 11.<br>58 | 932.8<br>641 |
| Set -2    | Cholesteryl ester       | UCD.Lipid.10  | CE 16:1       | CE (16:1)   | 16:1 Cholesteryl ester | [M+Na] <sup>+</sup>   | 10.<br>33 | 645.5<br>581 |
| Set -2    | Lysophosphatidylcholine | UCD.Lipid.119 | LPC 14:0      | LPC (14:0)  | LysoPC 14:0            | [M+H] <sup>+</sup>    | 0.9<br>81 | 468.3<br>089 |
| Set -2    | Phosphatidylcholine     | UCD.Lipid.133 | PC 28:0       | PC (28:0)   |                        | [M+H] <sup>+</sup>    | 4.2<br>39 | 678.5<br>065 |

|        |                          |                |           |                  |                     |               |           |              |
|--------|--------------------------|----------------|-----------|------------------|---------------------|---------------|-----------|--------------|
| Set -2 | Phosphatidylcholine      | UCD.Lipi d.134 | PC 30:0   | PC (30:0)        | PC(14:0_16:0)       | [M+H]<br>+    | 4.8<br>11 | 706.5<br>378 |
| Set -2 | Phosphatidylcholine      | UCD.Lipi d.135 | PC 30:1   | PC (30:1)        |                     | [M+H]<br>+    | 4.3<br>22 | 704.5<br>225 |
| Set -2 | Phosphatidylcholine      | UCD.Lipi d.136 | PC 31:0   | PC (31:0)        |                     | [M+H]<br>+    | 5.1<br>1  | 720.5<br>538 |
| Set -2 | Phosphatidylcholine      | UCD.Lipi d.137 | PC 31:1   | PC (31:1)        |                     | [M+H]<br>+    | 4.8<br>2  | 718.5<br>345 |
| Set -2 | Phosphatidylcholine      | UCD.Lipi d.138 | PC 32:3   | PC (32:3)        |                     | [M+H]<br>+    | 4.8<br>11 | 728.5<br>222 |
| Set -2 | Phosphatidylcholine      | UCD.Lipi d.139 | PC 33:0   | PC (33:0)        |                     | [M+H]<br>+    | 5.6<br>4  | 748.5<br>851 |
| Set -2 | Phosphatidylcholine      | UCD.Lipi d.383 | PC 32:1   | PC (32:1)        | PC(16:0_16:1)       | [M+Ac<br>-H]- | 5.0<br>33 | 790.5<br>6   |
| Set -2 | Phosphatidylcholine      | UCD.Lipi d.384 | PC 32:2   | PC (32:2)        | PC(14:0_18:2)       | [M+Ac<br>-H]- | 4.5<br>67 | 788.5<br>4   |
| Set -2 | Phosphatidylcholine      | UCD.Lipi d.385 | PC 33:1   | PC (33:1)        | PC(15:0_18:1)       | [M+Ac<br>-H]- | 5.3<br>4  | 804.5<br>8   |
| Set -2 | Phosphatidylcholine      | UCD.Lipi d.388 | PC 34:1   | PC (34:1)        | PC(16:0_18:1)       | [M+Ac<br>-H]- | 5.6<br>48 | 818.5<br>9   |
| Set -2 | Phosphatidylcholine      | UCD.Lipi d.390 | PC 34:3   | PC (34:3)        | PC(16:0_18:3)       | [M+Ac<br>-H]- | 4.7<br>5  | 814.5<br>6   |
| Set -2 | Phosphatidylcholine      | UCD.Lipi d.391 | PC 34:4   | PC (34:4)        | PC(14:0_20:4)       | [M+Ac<br>-H]- | 4.4<br>92 | 812.5<br>4   |
| Set -2 | Phosphatidylcholine      | UCD.Lipi d.392 | PC 35:1   | PC (35:1)        | PC(17:0_18:1)       | [M+Ac<br>-H]- | 5.9<br>73 | 832.6<br>1   |
| Set -2 | Phosphatidylcholine      | UCD.Lipi d.395 | PC 36:1   | PC (36:1)        | PC(18:0_18:1)       | [M+Ac<br>-H]- | 6.3<br>14 | 846.6<br>2   |
| Set -2 | Phosphatidylethanolamine | UCD.Lipi d.431 | PE 36:1   | PE (36:1)        | PE(18:0_18:1)       | [M-<br>H]-    | 5.6<br>48 | 744.5<br>5   |
| Set -2 | Phosphatidylethanolamine | UCD.Lipi d.437 | PE 40:6   | PE (40:6)        | PE(18:0_22:6)       | [M-<br>H]-    | 4.9<br>08 | 790.5<br>4   |
| Set -2 | Phosphatidylinositol     | UCD.Lipi d.452 | PI 32:1   | PI (32:1)        | PI(16:0_16:1)       | [M-<br>H]-    | 4.0<br>25 | 807.5        |
| Set -2 | Phosphatidylinositol     | UCD.Lipi d.458 | PI 36:4   | PI (36:4)        | PI(16:0_20:4)       | [M-<br>H]-    | 4.0<br>92 | 857.5<br>2   |
| Set -3 | Sphingomyelin            | UCD.Lipi d.169 | SM d30:1  | SM (d30:1)       | SM (d18:1_12:0)     | [M+H]<br>+    | 3.6<br>34 | 647.5<br>123 |
| Set -3 | Ceramide                 | UCD.Lipi d.257 | Cer d32:1 | Ceramide (d32:1) | Cer[NS](d16:1_16:0) | [M+Ac<br>-H]- | 5.0<br>91 | 568.4<br>9   |
| Set -3 | Ceramide                 | UCD.Lipi d.258 | Cer d33:1 | Ceramide (d33:1) | Cer[NS](d17:1_16:0) | [M+Cl]<br>-   | 5.4<br>15 | 558.4<br>7   |
| Set -3 | Ceramide                 | UCD.Lipi d.260 | Cer d34:1 | Ceramide (d34:1) | Cer[NS](d18:1_16:0) | [M+Ac<br>-H]- | 5.7<br>48 | 596.5<br>3   |
| Set -3 | Ceramide                 | UCD.Lipi d.261 | Cer d34:2 | Ceramide (d34:2) |                     | [M+Ac<br>-H]- | 5.1<br>82 | 594.5<br>1   |
| Set -3 | Ceramide                 | UCD.Lipi d.262 | Cer d36:1 | Ceramide (d36:1) | Cer[NS](d18:1_18:0) | [M+Cl]<br>-   | 6.4<br>55 | 600.5<br>1   |
| Set -3 | Ceramide                 | UCD.Lipi d.272 | Cer d43:1 | Ceramide (d43:1) | Cer[NS](d19:1_24:0) | [M+Cl]<br>-   | 8.6<br>82 | 698.6<br>2   |
| Set -3 | Sphingomyelin            | UCD.Lipi d.463 | SM d32:0  | SM (d32:0)       |                     | [M+Ac<br>-H]- | 4.4<br>67 | 735.5<br>6   |
| Set -3 | Sphingomyelin            | UCD.Lipi d.464 | SM d32:1  | SM (d32:1)       | SM(d18:1_14:0)      | [M+Ac<br>-H]- | 4.2<br>67 | 733.5<br>5   |
| Set -3 | Sphingomyelin            | UCD.Lipi d.465 | SM d32:2  | SM (d32:2)       |                     | [M+Ac<br>-H]- | 3.8<br>18 | 731.5<br>3   |
| Set -3 | Sphingomyelin            | UCD.Lipi d.466 | SM d33:1  | SM (d33:1)       | SM(d17:1_16:0)      | [M+Ac<br>-H]- | 4.5<br>58 | 747.5<br>7   |
| Set -3 | Sphingomyelin            | UCD.Lipi d.469 | SM d36:0  | SM (d36:0)       |                     | [M+Ac<br>-H]- | 5.7<br>65 | 791.6<br>3   |
| Set -3 | Sphingomyelin            | UCD.Lipi d.470 | SM d36:1  | SM (d36:1)       | SM(d18:1_18:0)      | [M+Ac<br>-H]- | 5.5<br>23 | 789.6<br>1   |
| Set -3 | Sphingomyelin            | UCD.Lipi d.473 | SM d37:1  | SM (d37:1)       |                     | [M+Ac<br>-H]- | 5.8<br>73 | 803.6<br>3   |
| Set -3 | Sphingomyelin            | UCD.Lipi d.474 | SM d38:0  | SM (d38:0)       | SM(d18:0_20:0)      | [M+Ac<br>-H]- | 6.4<br>55 | 819.6<br>6   |
| Set -3 | Sphingomyelin            | UCD.Lipi d.475 | SM d38:1  | SM (d38:1)       | SM(d18:1_20:0)      | [M+Ac<br>-H]- | 6.2<br>14 | 817.6<br>4   |

|        |                              |                |              |                            |                             |               |           |              |
|--------|------------------------------|----------------|--------------|----------------------------|-----------------------------|---------------|-----------|--------------|
| Set -3 | Sphingomyelin                | UCD.Lipi d.477 | SM d39:1     | SM (d39:1)                 | SM(d16:1_23:0)              | [M+Ac -H]-    | 6.5<br>55 | 831.6<br>6   |
| Set -3 | Sphingomyelin                | UCD.Lipi d.490 | SM d43:1     | SM (d43:1)                 |                             | [M+Ac -H]-    | 7.7<br>7  | 887.7<br>2   |
| Set -3 | Sphingomyelin                | UCD.Lipi d.491 | SM d43:2     | SM (d43:2)                 |                             | [M+Ac -H]-    | 7.0<br>79 | 885.7<br>1   |
| Set -4 | Lysophosphatidylcholine      | UCD.Lipi d.126 | LPC 20:5     | LPC (20:5)                 | LysoPC 20:5                 | [M+H]<br>+    | 0.9<br>64 | 542.3<br>239 |
| Set -4 | Lysophosphatidylcholine      | UCD.Lipi d.128 | LPC 22:6     | LPC (22:6)                 | LysoPC 22:6                 | [M+H]<br>+    | 1.1<br>55 | 568.3<br>404 |
| Set -4 | Phosphatidylcholine          | UCD.Lipi d.143 | PC 36:6      | PC (36:6)                  |                             | [M+H]<br>+    | 4.2<br>31 | 778.5<br>378 |
| Set -4 | Phosphatidylcholine          | UCD.Lipi d.145 | PC 37:6      | PC (37:6)                  |                             | [M+H]<br>+    | 4.4<br>96 | 792.5<br>538 |
| Set -4 | Phosphatidylcholine          | UCD.Lipi d.148 | PC 38:6<br>A | PC (38:6) A                | PC(16:0_22:6)               | [M+H]<br>+    | 4.7<br>78 | 806.5<br>691 |
| Set -4 | Phosphatidylcholine          | UCD.Lipi d.149 | PC 38:7      | PC (38:7)                  |                             | [M+H]<br>+    | 4.3<br>14 | 804.5<br>538 |
| Set -4 | Phosphatidylcholine          | UCD.Lipi d.150 | PC 39:6      | PC (39:6)                  |                             | [M+H]<br>+    | 5.0<br>27 | 820.5<br>851 |
| Set -4 | Cholesteroyl ester           | UCD.Lipi d.16  | CE 20:5      | CE (20:5)                  | 20:5 Cholesteroyl ester     | [M+Na ]+      | 9.7<br>11 | 693.5<br>581 |
| Set -4 | Cholesteroyl ester           | UCD.Lipi d.17  | CE 22:6      | CE (22:6)                  | 22:6 Cholesteroyl ester     | [M+Na ]+      | 9.8<br>94 | 719.5<br>738 |
| Set -4 | Lysophosphatidylethanolamine | UCD.Lipi d.381 | LPE 22:6     | LPE (22:6)                 | LysoPC 22:6                 | [M-H]-        | 1.2<br>63 | 524.2<br>8   |
| Set -4 | Phosphatidylcholine          | UCD.Lipi d.399 | PC 36:5<br>B | PC (36:5) B                | PC(16:1_20:4)               | [M+Ac -H]-    | 4.6<br>83 | 838.5<br>6   |
| Set -4 | Phosphatidylcholine          | UCD.Lipi d.406 | PC 38:6      | PC (38:6)                  | PC(18:1_20:5)_PC(18:2_20:4) | [M+Ac -H]-    | 4.9<br>08 | 864.5<br>8   |
| Set -4 | Phosphatidylcholine          | UCD.Lipi d.409 | PC 40:6<br>B | PC (40:6) B                | PC(18:0_22:6)               | [M+Ac -H]-    | 5.5<br>32 | 892.6<br>1   |
| Set -4 | Phosphatidylcholine          | UCD.Lipi d.410 | PC 40:7      | PC (40:7)                  | PC(18:1_22:6)               | [M+Ac -H]-    | 4.9<br>83 | 890.5<br>9   |
| Set -4 | Phosphatidylethanolamine     | UCD.Lipi d.442 | PE p-36:5    | PE (p-36:5) or PE (o-36:6) | PE(P-16:0_20:5)             | [M-H]-        | 5.0<br>99 | 720.5        |
| Set -4 | Phosphatidylinositol         | UCD.Lipi d.462 | PI 40:6      | PI (40:6)                  | PI(18:0_22:6)               | [M-H]-        | 4.5<br>08 | 909.5<br>5   |
| Set -4 | Fatty acid                   | UCD.Lipi d.513 | FA 20:5      | FA (20:5)                  | FA (20:5)                   | [M-H]-        | 1.5<br>3  | 301.2<br>2   |
| Set -4 | Fatty acid                   | UCD.Lipi d.517 | FA 22:6      | FA (22:6)                  | FA (22:6)                   | [M-H]-        | 1.7<br>2  | 327.2<br>3   |
| Set -5 | Diacylglycerol               | UCD.Lipi d.104 | DG 32:1      | DG (32:1)                  | DG(16:0_16:1)               | [M+Na ]+      | 6.1<br>43 | 589.4<br>812 |
| Set -5 | Diacylglycerol               | UCD.Lipi d.105 | DG 34:1      | DG (34:1)                  | DG(16:0_18:1)               | [M+Na ]+      | 6.8<br>92 | 617.5<br>116 |
| Set -5 | Diacylglycerol               | UCD.Lipi d.106 | DG 34:2      | DG (34:2)                  | DG(16:0_18:2)               | [M+Na ]+      | 6.2<br>7  | 615.4<br>965 |
| Set -5 | Diacylglycerol               | UCD.Lipi d.107 | DG 34:3      | DG (34:3)                  | DG(16:1_18:2)               | [M+N H4]<br>+ | 5.6<br>86 | 608.5<br>246 |
| Set -5 | Diacylglycerol               | UCD.Lipi d.109 | DG 36:2      | DG (36:2)                  | DG(18:1_18:1)               | [M+N H4]<br>+ | 6.9<br>5  | 638.5<br>718 |
| Set -5 | Diacylglycerol               | UCD.Lipi d.110 | DG 36:3      | DG (36:3)                  | DG(18:1_18:2)               | [M+N H4]<br>+ | 6.4<br>2  | 636.5<br>562 |
| Set -5 | Triacylglycerol              | UCD.Lipi d.190 | TG 48:3      | TG (48:3)                  | TG(12:0_18:1_18:2)          | [M+Na ]+      | 9.5<br>46 | 823.6<br>789 |
| Set -5 | Triacylglycerol              | UCD.Lipi d.191 | TG 48:4      | TG (48:4)                  | TG(12:0_18:2_18:2)          | [M+Na ]+      | 9.3<br>4  | 821.6<br>597 |
| Set -5 | Triacylglycerol              | UCD.Lipi d.195 | TG 49:3      | TG (49:3)                  | TG(15:0_16:1_18:2)          | [M+N H4]<br>+ | 9.7<br>94 | 832.7<br>389 |
| Set -5 | Triacylglycerol              | UCD.Lipi d.199 | TG 50:3      | TG (50:3)                  | TG(16:1_16:1_18:1)          | [M+N H4]<br>+ | 10.<br>02 | 846.7<br>545 |
| Set -5 | Triacylglycerol              | UCD.Lipi d.200 | TG 50:4      | TG (50:4)                  | TG(16:1_16:1_18:2)          | [M+Na ]+      | 9.6<br>29 | 849.6<br>943 |
| Set -5 | Triacylglycerol              | UCD.Lipi d.201 | TG 50:5      | TG (50:5)                  | TG(14:0_18:2_18:3)          | [M+Na ]+      | 9.2<br>4  | 847.6<br>786 |
| Set -5 | Triacylglycerol              | UCD.Lipi d.204 | TG 51:2      | TG (51:2)                  | TG(16:0_17:0_18:2)          | [M+N H4]<br>+ | 10.<br>62 | 862.7<br>858 |

|        |                          |               |                  |                              |                      |                        |       |          |
|--------|--------------------------|---------------|------------------|------------------------------|----------------------|------------------------|-------|----------|
| Set -5 | Triacylglycerol          | UCD.Lipid.205 | TG 51:3          | TG (51:3)                    | TG(15:0_18:1_18:2)   | [M+N H4] <sup>+</sup>  | 10.25 | 860.7702 |
| Set -5 | Triacylglycerol          | UCD.Lipid.210 | TG 52:2          | TG (52:2)                    | TG(16:0_18:1_18:1)   | [M+N H4] <sup>+</sup>  | 10.83 | 876.8015 |
| Set -5 | Triacylglycerol          | UCD.Lipid.211 | TG 52:3          | TG (52:3)                    | TG(16:0_18:1_18:2)   | [M+N H4] <sup>+</sup>  | 10.47 | 874.7858 |
| Set -5 | Triacylglycerol          | UCD.Lipid.216 | TG 53:2          | TG (53:2)                    | TG(17:0_18:1_18:1)   | [M+N H4] <sup>+</sup>  | 11.01 | 890.8171 |
| Set -5 | Triacylglycerol          | UCD.Lipid.217 | TG 53:3          | TG (53:3)                    | TG(17:0_18:1_18:2)   | [M+N H4] <sup>+</sup>  | 10.65 | 888.8015 |
| Set -6 | Diacylglycerol           | UCD.Lipid.108 | DG 36:1          | DG (36:1)                    | DG(18:0_18:1)        | [M+N H4] <sup>+</sup>  | 7.47  | 640.588  |
| Set -6 | Diacylglycerol           | UCD.Lipid.113 | DG 38:0          | DG (38:0)                    |                      | [M+N H4] <sup>+</sup>  | 7.94  | 670.6086 |
| Set -6 | Diacylglycerol           | UCD.Lipid.114 | DG 38:3          | DG (38:3)                    | DG(20:1_18:2)        | [M+Na] <sup>+</sup>    | 6.974 | 669.5653 |
| Set -6 | Diacylglycerol           | UCD.Lipid.116 | DG 38:6          | DG (38:6)                    | DG(18:2_20:4)        | [M+Na] <sup>+</sup>    | 5.732 | 663.4959 |
| Set -6 | Lysophosphatidylcholine  | UCD.Lipid.127 | LPC 22:4         | LPC (22:4)                   | LysoPC 22:4          | [M+H] <sup>+</sup>     | 1.661 | 572.3711 |
| Set -6 | Lysophosphatidylcholine  | UCD.Lipid.129 | LPC o-16:0       | LPC (o-16:0)                 | LPC (o-16:0)         | [M+H] <sup>+</sup>     | 1.752 | 482.3606 |
| Set -6 | Lysophosphatidylcholine  | UCD.Lipid.130 | LPC p-16:0       | LPC (p-16:0) or LPC (o-16:1) | LPC (o-16:1)         | [M+H] <sup>+</sup>     | 1.694 | 480.3448 |
| Set -6 | Lysophosphatidylcholine  | UCD.Lipid.131 | LPC p-18:0       | LPC (p-18:0) or LPC (o-18:1) | LPC (o-18:1)         | [M+H] <sup>+</sup>     | 1.909 | 508.3762 |
| Set -6 | Triacylglycerol          | UCD.Lipid.175 | TG 40:1          | TG (40:1)                    |                      | [M+N H4] <sup>+</sup>  | 8.384 | 710.6298 |
| Set -6 | Triacylglycerol          | UCD.Lipid.178 | TG 42:3          | TG (42:3)                    |                      | [M+N H4] <sup>+</sup>  | 8.24  | 734.6265 |
| Set -6 | Ceramide                 | UCD.Lipid.19  | Cer d42:2        | Ceramide (d42:2)             | Cer[NS](d18:2_24:0)  | [M+H] <sup>+</sup>     | 7.615 | 648.6289 |
| Set -6 | Triacylglycerol          | UCD.Lipid.253 | TG 60:6          | TG (60:6)                    |                      | [M+Na] <sup>+</sup>    | 11.27 | 985.8105 |
| Set -6 | Ceramide                 | UCD.Lipid.259 | Cer d34:0        | Ceramide (d34:0)             | Cer[NDS](d18:0_16:0) | [M+Ac -H] <sup>-</sup> | 5.998 | 598.54   |
| Set -6 | Phosphatidylethanolamine | UCD.Lipid.439 | PE p-36:1        | PE (p-36:1) or PE (o-36:2)   | PE(P-18:0_18:1)      | [M-H] <sup>-</sup>     | 6.838 | 728.56   |
| Set -6 | Fatty acid               | UCD.Lipid.511 | FA 20:3          | FA (20:3)                    | FA (20:3)            | [M-H] <sup>-</sup>     | 2.5   | 305.25   |
| Set -6 | Fatty acid               | UCD.Lipid.512 | FA 20:4          | FA (20:4)                    | FA (20:4)            | [M-H] <sup>-</sup>     | 1.93  | 303.23   |
| Set -6 | Fatty acid               | UCD.Lipid.515 | FA 22:1          | FA (22:1)                    | FA (22:1)            | [M-H] <sup>-</sup>     | 3.9   | 337.31   |
| Set -6 | Acylcarnitine            | UCD.Lipid.9   | AC C18:3         | Acylcarnitine C18:3          | Acylcarnitine 18:3   | [M+H] <sup>+</sup>     | 1.13  | 422.3265 |
| Set -7 | Phosphatidylcholine      | UCD.Lipid.142 | PC 36:4 A        | PC (36:4) A                  | PC(18:2_18:2)        | [M+H] <sup>+</sup>     | 4.637 | 782.5694 |
| Set -7 | Glucosylceramide         | UCD.Lipid.368 | GlcCer d24:1-2OH | GlcCer(d14:1(4E)/20:0(2OH))  |                      | [M+Cl] <sup>-</sup>    | 4.966 | 750.53   |
| Set -7 | Phosphatidylcholine      | UCD.Lipid.382 | PC 32:0          | PC (32:0)                    | PC(16:0_16:0)        | [M+Ac -H] <sup>-</sup> | 5.573 | 792.58   |
| Set -7 | Phosphatidylcholine      | UCD.Lipid.386 | PC 33:2          | PC (33:2)                    | PC(16:0_18:2)        | [M+Ac -H] <sup>-</sup> | 4.858 | 802.56   |
| Set -7 | Phosphatidylcholine      | UCD.Lipid.387 | PC 34:0          | PC (34:0)                    | PC(16:0_18:0)        | [M+Ac -H] <sup>-</sup> | 6.239 | 820.61   |
| Set -7 | Phosphatidylcholine      | UCD.Lipid.389 | PC 34:2          | PC (34:2)                    | PC(16:0_18:2)        | [M+Ac -H] <sup>-</sup> | 5.166 | 816.58   |
| Set -7 | Phosphatidylcholine      | UCD.Lipid.393 | PC 35:2          | PC (35:2)                    | PC(17:0_18:2)        | [M+Ac -H] <sup>-</sup> | 5.48  | 830.59   |
| Set -7 | Phosphatidylcholine      | UCD.Lipid.396 | PC 36:2          | PC (36:2)                    | PC(18:0_18:2)        | [M+Ac -H] <sup>-</sup> | 5.806 | 844.61   |
| Set -7 | Phosphatidylcholine      | UCD.Lipid.400 | PC 37:2          | PC (37:2)                    | PC(19:0_18:2)        | [M+Ac -H] <sup>-</sup> | 6.14  | 858.62   |
| Set -7 | Phosphatidylethanolamine | UCD.Lipid.434 | PE 38:2          | PE (38:2)                    | PE(20:0_18:2)        | [M-H] <sup>-</sup>     | 5.806 | 770.57   |

|        |                              |               |             |                            |                    |           |       |          |
|--------|------------------------------|---------------|-------------|----------------------------|--------------------|-----------|-------|----------|
| Set -7 | Phosphatidylethanolamine     | UCD.Lipid.443 | PE p-38:2   | PE (p-38:2) or PE (o-38:3) |                    | [M-H]-    | 6.98  | 754.58   |
| Set -7 | Phosphatidylethanolamine     | UCD.Lipid.448 | PE p-40:4   | PE (p-40:4) or PE (o-40:5) | PE(P-20:0_20:4)    | [M-H]-    | 6.87  | 778.58   |
| Set -7 | Phosphatidylinositol         | UCD.Lipid.453 | PI 34:1     | PI (34:1)                  | PI(16:0_18:1)      | [M-H]-    | 4.483 | 835.53   |
| Set -7 | Phosphatidylinositol         | UCD.Lipid.454 | PI 34:2     | PI (34:2)                  | PI(16:0_18:2)      | [M-H]-    | 4.158 | 833.52   |
| Set -7 | Phosphatidylinositol         | UCD.Lipid.455 | PI 36:1     | PI (36:1)                  | PI(18:0_18:1)      | [M-H]-    | 5.198 | 863.57   |
| Set -7 | Phosphatidylinositol         | UCD.Lipid.456 | PI 36:2     | PI (36:2)                  | PI(18:0_18:2)      | [M-H]-    | 4.732 | 861.55   |
| Set -7 | Phosphatidylinositol         | UCD.Lipid.457 | PI 36:3     | PI (36:3)                  | PI(16:0_20:3)      | [M-H]-    | 4.225 | 859.53   |
| Set -8 | Lysophosphatidylcholine      | UCD.Lipid.120 | LPC 15:0    | LPC (15:0)                 | LysoPC 15:0        | [M+H]+    | 1.206 | 482.3241 |
| Set -8 | Lysophosphatidylcholine      | UCD.Lipid.121 | LPC 17:1    | LPC (17:1)                 | LysoPC 17:1        | [M+H]+    | 1.345 | 508.3401 |
| Set -8 | Lysophosphatidylcholine      | UCD.Lipid.122 | LPC 18:0    | LPC (18:0)                 | LysoPC 18:0        | [M+H]+    | 2.258 | 524.3708 |
| Set -8 | Lysophosphatidylcholine      | UCD.Lipid.123 | LPC 18:3    | LPC (18:3)                 | LysoPC 18:3        | [M+H]+    | 0.981 | 518.3241 |
| Set -8 | Lysophosphatidylcholine      | UCD.Lipid.124 | LPC 20:0    | LPC (20:0)                 | LysoPC 20:0        | [M+H]+    | 3.062 | 552.4021 |
| Set -8 | Lysophosphatidylcholine      | UCD.Lipid.369 | LPC 16:0    | LPC (16:0)                 | LysoPC 16:0        | [M+Ac-H]- | 1.563 | 554.35   |
| Set -8 | Lysophosphatidylcholine      | UCD.Lipid.370 | LPC 16:1    | LPC (16:1)                 | LysoPC 16:1        | [M+Ac-H]- | 1.18  | 552.33   |
| Set -8 | Lysophosphatidylcholine      | UCD.Lipid.371 | LPC 18:0 A  | LPC (18:0) A               | LysoPC 18:0        | [M+Ac-H]- | 2.145 | 582.38   |
| Set -8 | Lysophosphatidylcholine      | UCD.Lipid.372 | LPC 18:1    | LPC (18:1)                 | LysoPC 18:1        | [M+Ac-H]- | 1.713 | 580.36   |
| Set -8 | Lysophosphatidylcholine      | UCD.Lipid.373 | LPC 18:2    | LPC (18:2)                 | LysoPC 18:2        | [M+Ac-H]- | 1.313 | 578.35   |
| Set -8 | Lysophosphatidylcholine      | UCD.Lipid.374 | LPC 20:1    | LPC (20:1)                 | LysoPC 20:1        | [M+Ac-H]- | 2.47  | 608.39   |
| Set -8 | Lysophosphatidylcholine      | UCD.Lipid.375 | LPC 20:2    | LPC (20:2)                 | LysoPC 20:2        | [M+Ac-H]- | 1.896 | 606.38   |
| Set -8 | Lysophosphatidylcholine      | UCD.Lipid.376 | LPC 20:3    | LPC (20:3)                 | LysoPC 20:3        | [M+Ac-H]- | 1.505 | 604.36   |
| Set -8 | Lysophosphatidylcholine      | UCD.Lipid.377 | LPC 22:5    | LPC (22:5)                 | LysoPC 22:5        | [M+Ac-H]- | 1.388 | 628.36   |
| Set -8 | Lysophosphatidylethanolamine | UCD.Lipid.378 | LPE 16:0    | LPE (16:0)                 | LysoPE 16:0        | [M-H]-    | 1.596 | 452.28   |
| Set -8 | Lysophosphatidylethanolamine | UCD.Lipid.379 | LPE 18:2    | LPE (18:2)                 | LysoPE 18:2        | [M-H]-    | 1.347 | 476.28   |
| Set -9 | Phosphatidylcholine          | UCD.Lipid.132 | PC 27:0-CHO | PC (16:0/9:0(CHO))         | PC (16:0_9:0(CHO)) | [M+H]+    | 2.374 | 650.4391 |
| Set -9 | Triacylglycerol              | UCD.Lipid.176 | TG 42:1     | TG (42:1)                  | TG(12:0_12:0_18:1) | [M+Na]+   | 8.967 | 743.6162 |
| Set -9 | Fatty acid                   | UCD.Lipid.493 | FA 11:0     | FA (11:0)                  | FA (11:0)          | [M-H]-    | 0.82  | 185.15   |
| Set -9 | Fatty acid                   | UCD.Lipid.494 | FA 12:0     | FA (12:0)                  | FA (12:0)          | [M-H]-    | 1.06  | 199.17   |
| Set -9 | Fatty acid                   | UCD.Lipid.495 | FA 13:0     | FA (13:0)                  | FA (13:0)          | [M-H]-    | 1.3   | 213.19   |
| Set -9 | Fatty acid                   | UCD.Lipid.496 | FA 14:0     | FA (14:0)                  | FA (14:0)          | [M-H]-    | 1.63  | 227.2    |
| Set -9 | Fatty acid                   | UCD.Lipid.498 | FA 15:0     | FA (15:0)                  | FA (15:0)          | [M-H]-    | 2.02  | 241.22   |
| Set -9 | Fatty acid                   | UCD.Lipid.499 | FA 15:1     | FA (15:1)                  | FA (15:1)          | [M-H]-    | 1.5   | 239.2    |
| Set -9 | Fatty acid                   | UCD.Lipid.500 | FA 16:0     | FA (16:0)                  | FA (16:0)          | [M-H]-    | 2.47  | 255.23   |
| Set -9 | Fatty acid                   | UCD.Lipid.502 | FA 17:0     | FA (17:0)                  | FA (17:0)          | [M-H]-    | 2.96  | 269.25   |
| Set -9 | Fatty acid                   | UCD.Lipid.504 | FA 18:0     | FA (18:0)                  | FA (18:0)          | [M-H]-    | 3.26  | 283.26   |

|         |                      |                |               |                                                               |                        |               |           |              |
|---------|----------------------|----------------|---------------|---------------------------------------------------------------|------------------------|---------------|-----------|--------------|
| Set -9  | Fatty acid           | UCD.Lipi d.508 | FA 20:0       | FA (20:0)                                                     | FA (20:0)              | [M-H]-        | 3.8<br>5  | 311.3        |
| Set -9  | Fatty acid           | UCD.Lipi d.514 | FA 22:0       | FA (22:0)                                                     | FA (22:0)              | [M-H]-        | 4.5       | 339.3<br>3   |
| Set -9  | Fatty acid           | UCD.Lipi d.518 | FA 24:0       | FA (24:0)                                                     | FA (24:0)              | [M-H]-        | 5.2<br>3  | 367.3<br>6   |
| Set -9  | Fatty acid           | UCD.Lipi d.520 | FA 26:0       | FA (26:0)                                                     | FA (26:0)              | [M-H]-        | 6.0<br>2  | 395.3<br>9   |
| Set -9  | Fatty acid           | UCD.Lipi d.521 | FA 28:0       | FA (28:0)                                                     | FA (28:0)              | [M-H]-        | 6.8<br>2  | 423.4<br>2   |
| Set -10 | Sphingomyelin        | UCD.Lipi d.171 | SM d40:2      | SM (d40:2)                                                    |                        | [M+H]<br>+    | 6.0<br>38 | 785.6<br>531 |
| Set -10 | Phosphatidylinositol | UCD.Lipi d.461 | PI 38:5       | PI (38:5)                                                     | PI(18:1_20:4)          | [M-H]-        | 4.1<br>42 | 883.5<br>3   |
| Set -10 | Sphingomyelin        | UCD.Lipi d.468 | SM d34:2      | SM (d34:2)                                                    | SM(d18:2_16:0)         | [M+Ac<br>-H]- | 4.3<br>59 | 759.5<br>7   |
| Set -10 | Sphingomyelin        | UCD.Lipi d.471 | SM d36:2      | SM (d36:2)                                                    |                        | [M+Ac<br>-H]- | 4.9<br>74 | 787.6        |
| Set -10 | Sphingomyelin        | UCD.Lipi d.472 | SM d36:3      | SM (d36:3)                                                    |                        | [M+Ac<br>-H]- | 4.5<br>08 | 785.5<br>8   |
| Set -10 | Sphingomyelin        | UCD.Lipi d.476 | SM d38:2      | SM (d38:2)                                                    |                        | [M+Ac<br>-H]- | 5.6<br>23 | 815.6<br>3   |
| Set -10 | Sphingomyelin        | UCD.Lipi d.478 | SM d39:2      | SM (d39:2)                                                    |                        | [M+Ac<br>-H]- | 5.9<br>88 | 829.6<br>4   |
| Set -10 | Sphingomyelin        | UCD.Lipi d.479 | SM d40:0      | SM (d40:0)                                                    |                        | [M+Ac<br>-H]- | 7.1<br>38 | 847.6<br>9   |
| Set -10 | Sphingomyelin        | UCD.Lipi d.480 | SM d40:1      | SM (d40:1)                                                    | SM(d18:1_22:0)         | [M+Ac<br>-H]- | 6.8<br>88 | 845.6<br>7   |
| Set -10 | Sphingomyelin        | UCD.Lipi d.481 | SM d40:2<br>A | SM (d40:2) A                                                  |                        | [M+Ac<br>-H]- | 6.2<br>05 | 843.6<br>6   |
| Set -10 | Sphingomyelin        | UCD.Lipi d.482 | SM d40:2<br>B | SM (d40:2) B                                                  | SM(d18:2_22:0)         | [M+Ac<br>-H]- | 6.3<br>06 | 843.6<br>6   |
| Set -10 | Sphingomyelin        | UCD.Lipi d.483 | SM d40:3      | SM (d40:3)                                                    |                        | [M+Ac<br>-H]- | 5.6<br>4  | 841.6<br>4   |
| Set -10 | Sphingomyelin        | UCD.Lipi d.484 | SM d41:1      | SM (d41:1)                                                    | SM(d18:1_23:0)         | [M+Ac<br>-H]- | 7.2<br>29 | 859.6<br>9   |
| Set -10 | Sphingomyelin        | UCD.Lipi d.485 | SM d41:2      | SM (d41:2)                                                    | SM(d18:2_23:0)         | [M+Ac<br>-H]- | 6.6<br>5  | 857.6<br>7   |
| Set -10 | Sphingomyelin        | UCD.Lipi d.486 | SM d42:0      | SM (d42:0)                                                    |                        | [M+Ac<br>-H]- | 7.7<br>94 | 875.7<br>2   |
| Set -10 | Sphingomyelin        | UCD.Lipi d.487 | SM d42:1      | SM (d42:1)                                                    | SM(d18:1_24:0)         | [M+Ac<br>-H]- | 7.5<br>62 | 873.7<br>1   |
| Set -11 | Glactoylceramide     | UCD.Lipi d.117 | LacCer d34:1  | Gal-Gal-Cer(d18:1/16:0)<br>or<br>Lactosylceramide(d18:1/16:0) |                        | [M+H]<br>+    | 4.7<br>95 | 862.6<br>25  |
| Set -11 | Lactosylceramide     | UCD.Lipi d.118 | LacCer d32:2  | Lactosylceramide (d18:1/24:1(15Z))                            |                        | [M+H]<br>+    | 6.6<br>85 | 972.7<br>346 |
| Set -11 | Cholesteryl ester    | UCD.Lipi d.12  | CE 18:2       | CE (18:2)                                                     | 18:2 Cholesteryl ester | [M+N<br>H4]+  | 10.<br>4  | 666.6<br>184 |
| Set -11 | Phosphatidylcholine  | UCD.Lipi d.155 | PC o-34:0     | PC (o-34:0)                                                   |                        | [M+H]<br>+    | 6.4<br>78 | 748.6<br>204 |
| Set -11 | Phosphatidylcholine  | UCD.Lipi d.156 | PC p-32:1     | PC (p-32:1) or PC (o-32:2)                                    |                        | [M+H]<br>+    | 4.9<br>1  | 716.5<br>626 |
| Set -11 | Phosphatidylcholine  | UCD.Lipi d.157 | PC p-34:1     | PC (p-34:1) or PC (o-34:2) B                                  | PC(P-16:0_18:1)        | [M+H]<br>+    | 5.7<br>9  | 744.5<br>908 |
| Set -11 | Phosphatidylcholine  | UCD.Lipi d.160 | PC p-40:1     | PC (p-40:1) or PC (o-40:2)                                    |                        | [M+H]<br>+    | 6.6<br>37 | 828.6<br>842 |
| Set -11 | Sphingomyelin        | UCD.Lipi d.170 | SM d34:0      | SM (d34:0)                                                    |                        | [M+H]<br>+    | 4.9<br>6  | 705.5<br>905 |
| Set -11 | Glucosylceramide     | UCD.Lipi d.363 | GlcCer d38:1  | GlcCer (d38:1)                                                |                        | [M+Ac<br>-H]- | 6.4<br>89 | 814.6<br>4   |
| Set -11 | Glucosylceramide     | UCD.Lipi d.364 | GlcCer d40:1  | GlcCer (d40:1)                                                | GlcCer[NS](d18:1_22:0) | [M+Ac<br>-H]- | 7.1<br>63 | 842.6<br>7   |
| Set -11 | Glucosylceramide     | UCD.Lipi d.365 | GlcCer d41:1  | GlcCer (d41:1)                                                |                        | [M+Ac<br>-H]- | 7.4<br>95 | 856.6<br>9   |
| Set -11 | Glucosylceramide     | UCD.Lipi d.366 | GlcCer d42:1  | GlcCer (d42:1)                                                | GlcCer[NS](d18:1_24:0) | [M+Ac<br>-H]- | 7.8<br>2  | 870.7        |

|         |                     |                |              |                            |                        |            |           |              |
|---------|---------------------|----------------|--------------|----------------------------|------------------------|------------|-----------|--------------|
| Set -11 | Glucosylceramide    | UCD.Lipi d.367 | GlcCer d42:2 | GlcCer (d42:2)             | GlcCer[NS](d18:1_24:1) | [M+Ac -H]- | 7.1<br>38 | 868.6<br>9   |
| Set -11 | Phosphatidylcholine | UCD.Lipi d.412 | PC o-32:0    | PC (o-32:0)                |                        | [M+Ac -H]- | 5.9<br>73 | 778.5<br>9   |
| Set -11 | Phosphatidylcholine | UCD.Lipi d.414 | PC p-34:0    | PC (p-34:0) or PC (o-34:1) | PC(P-18:0_16:0)        | [M+Ac -H]- | 6.0<br>39 | 804.6<br>1   |
| Set -11 | Sphingomyelin       | UCD.Lipi d.467 | SM d34:1     | SM (d34:1)                 | SM(d18:1_16:0)         | [M+Ac -H]- | 4.8<br>66 | 761.5<br>8   |
| Set -12 | Diacylglycerol      | UCD.Lipi d.111 | DG 36:4      | DG (36:4)                  | DG(18:2_18:2)          | [M+N H4]+  | 5.8<br>15 | 634.5<br>404 |
| Set -12 | Diacylglycerol      | UCD.Lipi d.112 | DG 36:5      | DG (36:5)                  | DG(18:2_18:3)          | [M+N H4]+  | 5.6<br>5  | 632.5<br>248 |
| Set -12 | Triacylglycerol     | UCD.Lipi d.206 | TG 51:4      | TG (51:4)                  | TG(15:0_18:2_18:2)     | [M+Na ]+   | 9.8<br>77 | 863.7<br>099 |
| Set -12 | Triacylglycerol     | UCD.Lipi d.207 | TG 51:5      | TG (51:5)                  | TG(15:0_18:2_18:3)     | [M+N H4]+  | 9.7<br>7  | 856.7<br>347 |
| Set -12 | Triacylglycerol     | UCD.Lipi d.212 | TG 52:4      | TG (52:4)                  | TG(16:1_18:1_18:2)     | [M+N H4]+  | 10.<br>1  | 872.7<br>702 |
| Set -12 | Triacylglycerol     | UCD.Lipi d.213 | TG 52:5      | TG (52:5)                  | TG(16:0_18:2_18:3)     | [M+N H4]+  | 9.7<br>28 | 870.7<br>545 |
| Set -12 | Triacylglycerol     | UCD.Lipi d.214 | TG 52:6      | TG (52:6)                  | TG(16:1_18:2_18:3)     | [M+Na ]+   | 9.3<br>5  | 873.6<br>943 |
| Set -12 | Triacylglycerol     | UCD.Lipi d.218 | TG 53:4      | TG (53:4)                  | TG(17:1_18:1_18:2)     | [M+N H4]+  | 10.<br>32 | 886.7<br>858 |
| Set -12 | Triacylglycerol     | UCD.Lipi d.219 | TG 53:5      | TG (53:5)                  | TG(17:1_18:2_18:2)     | [M+N H4]+  | 9.9<br>02 | 884.7<br>702 |
| Set -12 | Triacylglycerol     | UCD.Lipi d.223 | TG 54:3      | TG (54:3)                  | TG(18:0_18:1_18:2)     | [M+N H4]+  | 10.<br>86 | 902.8<br>171 |
| Set -12 | Triacylglycerol     | UCD.Lipi d.224 | TG 54:4      | TG (54:4)                  | TG(18:1_18:1_18:2)     | [M+N H4]+  | 10.<br>49 | 900.8<br>015 |
| Set -12 | Triacylglycerol     | UCD.Lipi d.225 | TG 54:5      | TG (54:5)                  | TG(18:1_18:2_18:2)     | [M+Na ]+   | 10.<br>12 | 903.7<br>412 |
| Set -12 | Triacylglycerol     | UCD.Lipi d.226 | TG 54:6      | TG (54:6)                  | TG(18:1_18:2_18:3)     | [M+Na ]+   | 9.7<br>45 | 901.7<br>256 |
| Set -12 | Triacylglycerol     | UCD.Lipi d.227 | TG 54:8      | TG (54:8)                  | TG(18:2_18:3_18:3)     | [M+Na ]+   | 8.9<br>4  | 897.6<br>943 |
| Set -13 | Triacylglycerol     | UCD.Lipi d.228 | TG 56:1      | TG (56:1)                  | TG(18:0_18:1_20:0)     | [M+N H4]+  | 11.<br>85 | 934.8<br>797 |
| Set -13 | Triacylglycerol     | UCD.Lipi d.237 | TG 57:1      | TG (57:1)                  |                        | [M+N H4]+  | 12        | 948.8<br>863 |
| Set -13 | Triacylglycerol     | UCD.Lipi d.238 | TG 57:2      | TG (57:2)                  |                        | [M+N H4]+  | 11.<br>88 | 946.8<br>718 |
| Set -13 | Triacylglycerol     | UCD.Lipi d.239 | TG 58:1      | TG (58:1)                  | TG(18:0_18:1_22:0)     | [M+N H4]+  | 11.<br>99 | 962.9<br>11  |
| Set -13 | Triacylglycerol     | UCD.Lipi d.241 | TG 58:2      | TG (58:2)                  | TG(18:1_18:1_22:0)     | [M+N H4]+  | 11.<br>85 | 960.8<br>954 |
| Set -13 | Triacylglycerol     | UCD.Lipi d.242 | TG 58:3      | TG (58:3)                  | TG(18:1_20:1_20:1)     | [M+N H4]+  | 11.<br>6  | 958.8<br>797 |
| Set -13 | Triacylglycerol     | UCD.Lipi d.247 | TG 59:2      | TG (59:2)                  |                        | [M+N H4]+  | 12        | 974.9<br>031 |
| Set -13 | Triacylglycerol     | UCD.Lipi d.248 | TG 59:3      | TG (59:3)                  |                        | [M+N H4]+  | 11.<br>89 | 972.8<br>871 |
| Set -13 | Triacylglycerol     | UCD.Lipi d.250 | TG 60:2      | TG (60:2)                  | TG(18:1_20:1_22:0)     | [M+N H4]+  | 11.<br>99 | 988.9<br>267 |
| Set -13 | Triacylglycerol     | UCD.Lipi d.251 | TG 60:3      | TG (60:3)                  | TG(18:1_20:1_22:1)     | [M+N H4]+  | 11.<br>95 | 986.9<br>034 |
| Set -13 | Triacylglycerol     | UCD.Lipi d.252 | TG 60:4      | TG (60:4)                  | TG(18:1_20:2_22:1)     | [M+N H4]+  | 11.<br>78 | 984.8<br>877 |
| Set -13 | Triacylglycerol     | UCD.Lipi d.254 | TG 62:3      | TG (62:3)                  |                        | [M+N H4]+  | 12.<br>04 | 1014.<br>934 |
| Set -13 | Triacylglycerol     | UCD.Lipi d.255 | TG 62:4      | TG (62:4)                  |                        | [M+N H4]+  | 11.<br>94 | 1012.<br>918 |
| Set -13 | Triacylglycerol     | UCD.Lipi d.256 | TG 64:4      | TG (64:4)                  |                        | [M+N H4]+  | 12.<br>04 | 1040.<br>949 |
| Set -14 | Ceramide            | UCD.Lipi d.18  | Cer d41:1    | Ceramide (d18:1/23:0)      | Cer[NS](d18:1_23:0)    | [M+H ]+    | 7.9<br>63 | 636.6<br>289 |
| Set -14 | Ceramide            | UCD.Lipi d.263 | Cer d38:1    | Ceramide (d38:1)           | Cer[NS](d18:1_20:0)    | [M+Cl ]-   | 7.1<br>63 | 628.5<br>4   |

|         |                          |                |             |                              |                      |                    |           |              |
|---------|--------------------------|----------------|-------------|------------------------------|----------------------|--------------------|-----------|--------------|
| Set -14 | Ceramide                 | UCD.Lipi d.264 | Cer d39:1   | Ceramide (d39:1)             | Cer[NS](d18:1_22:0)  | [M+Cl]<br>-        | 7.5<br>12 | 642.5<br>6   |
| Set -14 | Ceramide                 | UCD.Lipi d.265 | Cer d40:0   | Ceramide (d40:0)             | Cer[NDS](d18:0_22:0) | [M+Ac<br>-H]-      | 8.0<br>61 | 682.6<br>3   |
| Set -14 | Ceramide                 | UCD.Lipi d.266 | Cer d40:1   | Ceramide (d40:1)             | Cer[NS](d18:1_22:0)  | [M+Cl]<br>-        | 7.8<br>36 | 656.5<br>8   |
| Set -14 | Ceramide                 | UCD.Lipi d.267 | Cer d40:2   | Ceramide (d40:2)             | Cer[NS](d18:2_22:0)  | [M+Cl]<br>-        | 7.1<br>85 | 654.5<br>6   |
| Set -14 | Ceramide                 | UCD.Lipi d.268 | Cer d41:1   | Ceramide (d41:1)             | Cer[NS](d18:1_23:0)  | [M+Cl]<br>-        | 8.1<br>61 | 670.5<br>9   |
| Set -14 | Ceramide                 | UCD.Lipi d.269 | Cer d42:0   | Ceramide (d42:0)             | Cer[NDS](d18:0_24:0) | [M+Cl]<br>-        | 8.6<br>85 | 686.6<br>2   |
| Set -14 | Ceramide                 | UCD.Lipi d.270 | Cer d42:1   | Ceramide (d42:1)             | Cer[NS](d18:1_24:0)  | [M+Ac<br>-H]-      | 8.4<br>69 | 708.6<br>5   |
| Set -14 | Ceramide                 | UCD.Lipi d.271 | Cer d42:2 A | Ceramide (d42:2) A           | Cer[NS](d18:1_24:1)  | [M+Cl]<br>-        | NA        | NA           |
| Set -14 | Ceramide                 | UCD.Lipi d.273 | Cer d44:1   | Ceramide (d44:1)             |                      | [M+Cl]<br>-        | 9.0<br>68 | 712.6<br>4   |
| Set -15 | Phosphatidylcholine      | UCD.Lipi d.159 | PC p-38:4   | PC (p-38:4) or PC (o-38:5) B | PC(P-18:0_20:4)      | [M+H]<br>+         | 5.8<br>23 | 794.6<br>054 |
| Set -15 | Phosphatidylethanolamine | UCD.Lipi d.167 | PE 38:4     | PE (38:4)                    | PE(18:0_20:4)        | [M+H]<br>+         | 5.7<br>23 | 768.5<br>56  |
| Set -15 | Phosphatidylcholine      | UCD.Lipi d.413 | PC p-32:0   | PC (p-32:0) or PC (o-32:1)   | PC(P-16:0_16:0)      | [M+Ac<br>-H]-      | 5.8<br>81 | 776.5<br>8   |
| Set -15 | Phosphatidylcholine      | UCD.Lipi d.415 | PC p-34:1   | PC (p-34:1) or PC (o-34:2) A | PC(P-16:0_18:1)      | [M+Ac<br>-H]-      | 5.5<br>4  | 802.6        |
| Set -15 | Phosphatidylcholine      | UCD.Lipi d.416 | PC p-34:2   | PC (p-34:2) or PC (o-34:3)   | PC(P-16:0_18:2)      | [M+Ac<br>-H]-      | 5.4<br>4  | 800.5<br>8   |
| Set -15 | Phosphatidylcholine      | UCD.Lipi d.417 | PC p-36:1   | PC (p-36:1) or PC (o-36:2)   | PC(P-18:0_18:1)      | [M+Ac<br>-H]-      | 6.2       | 830.6<br>3   |
| Set -15 | Phosphatidylcholine      | UCD.Lipi d.418 | PC p-36:2   | PC (p-36:2) or PC (o-36:3)   | PC(P-18:0_18:2)      | [M+Ac<br>-H]-      | 5.5<br>9  | 828.6<br>1   |
| Set -15 | Phosphatidylcholine      | UCD.Lipi d.419 | PC p-36:3   | PC (p-36:3) or PC (o-36:4)   | PC(P-16:0_20:3)      | [M+Ac<br>-H]-      | 5.4<br>4  | 826.6        |
| Set -15 | Phosphatidylcholine      | UCD.Lipi d.420 | PC p-36:4   | PC (p-36:4) or PC (o-36:5)   | PC(P-16:0_20:4)      | [M+Ac<br>-H]-      | 5.3<br>32 | 824.5<br>8   |
| Set -15 | Phosphatidylcholine      | UCD.Lipi d.422 | PC p-38:4   | PC (p-38:4) or PC (o-38:5) A | PC(P-18:0_20:4)      | [M+Ac<br>-H]-      | 5.4<br>82 | 852.6<br>1   |
| Set -15 | Phosphatidylcholine      | UCD.Lipi d.423 | PC p-38:5   | PC (p-38:5) or PC (o-38:6)   | PC(P-18:0_20:5)      | [M+Ac<br>-H]-      | 5.2<br>57 | 850.6        |
| Set -16 | Acylcarnitine            | UCD.Lipi d.1   | AC C8:0     | Acylcarnitine C8:0           | Acylcarnitine 8:0    | [M+H]<br>+         | 0.5<br>5  | 288.2<br>169 |
| Set -16 | Acylcarnitine            | UCD.Lipi d.2   | AC C8:1     | Acylcarnitine C8:1           | Acylcarnitine 8:1    | [M+H]<br>+         | 0.5<br>2  | 286.2<br>013 |
| Set -16 | Cholesterol              | UCD.Lipi d.20  | Cholesterol | Cholesterol                  |                      | [M-<br>H2O+<br>H]+ | 4.8<br>61 | 369.3<br>516 |
| Set -16 | Acylcarnitine            | UCD.Lipi d.3   | AC C10:1    | Acylcarnitine C10:1          | Acylcarnitine 10:1   | [M+H]<br>+         | 0.5<br>9  | 314.2<br>326 |
| Set -16 | Acylcarnitine            | UCD.Lipi d.4   | AC C12:0    | Acylcarnitine C12:0          | Acylcarnitine 12:0   | [M+H]<br>+         | 0.7<br>4  | 344.2<br>801 |
| Set -16 | Acylcarnitine            | UCD.Lipi d.5   | AC C16:0    | Acylcarnitine C16:0          | Acylcarnitine 16:0   | [M+H]<br>+         | 1.5<br>86 | 400.3<br>42  |
| Set -16 | Fatty acid               | UCD.Lipi d.519 | FA 24:1     | FA (24:1)                    | FA (24:1)            | [M-<br>H]-         | 4.5<br>2  | 365.3<br>4   |
| Set -16 | Acylcarnitine            | UCD.Lipi d.6   | AC C18:0    | Acylcarnitine C18:0          | Acylcarnitine 18:0   | [M+H]<br>+         | 2.3<br>4  | 428.3<br>727 |
| Set -16 | Acylcarnitine            | UCD.Lipi d.7   | AC C18:1    | Acylcarnitine C18:1          | Acylcarnitine 18:1   | [M+H]<br>+         | 1.7<br>43 | 426.3<br>578 |
| Set -16 | Acylcarnitine            | UCD.Lipi d.8   | AC C18:2    | Acylcarnitine C18:2          | Acylcarnitine 18:2   | [M+H]<br>+         | 1.3<br>29 | 424.3<br>425 |
| Set -17 | Fatty acid               | UCD.Lipi d.497 | FA 14:1     | FA (14:1)                    | FA (14:1)            | [M-<br>H]-         | 1.2       | 225.1<br>9   |
| Set -17 | Fatty acid               | UCD.Lipi d.501 | FA 16:1     | FA (16:1)                    | FA (16:1)            | [M-<br>H]-         | 1.8<br>2  | 253.2<br>2   |
| Set -17 | Fatty acid               | UCD.Lipi d.503 | FA 17:1     | FA (17:1)                    | FA (17:1)            | [M-<br>H]-         | 2.2<br>2  | 267.2<br>3   |



|         |                         |                |           |                            |                    |                        |       |          |
|---------|-------------------------|----------------|-----------|----------------------------|--------------------|------------------------|-------|----------|
| Set -17 | Fatty acid              | UCD.Lipi d.505 | FA 18:1   | FA (18:1)                  | FA (18:1)          | [M-H] <sub>-</sub>     | 2.7   | 281.25   |
| Set -17 | Fatty acid              | UCD.Lipi d.506 | FA 18:2   | FA (18:2)                  | FA (18:2)          | [M-H] <sub>-</sub>     | 2.05  | 279.23   |
| Set -17 | Fatty acid              | UCD.Lipi d.507 | FA 18:3   | FA (18:3)                  | FA (18:3)          | [M-H] <sub>-</sub>     | 1.623 | 277.22   |
| Set -17 | Fatty acid              | UCD.Lipi d.509 | FA 20:1   | FA (20:1)                  | FA (20:1)          | [M-H] <sub>-</sub>     | 3.35  | 309.28   |
| Set -17 | Fatty acid              | UCD.Lipi d.510 | FA 20:2   | FA (20:2)                  | FA (20:2)          | [M-H] <sub>-</sub>     | 2.91  | 307.26   |
| Set -17 | Fatty acid              | UCD.Lipi d.516 | FA 22:2   | FA (22:2)                  | FA (22:2)          | [M-H] <sub>-</sub>     | 3.47  | 335.3    |
| Set -18 | Diacylglycerol          | UCD.Lipi d.115 | DG 38:5   | DG (38:5)                  | DG(18:1_20:4)      | [M+N H4] <sub>+</sub>  | 6.246 | 660.5562 |
| Set -18 | Triacylglycerol         | UCD.Lipi d.222 | TG 54:2   | TG (54:2)                  | TG(18:0_18:1_18:1) | [M+N H4] <sub>+</sub>  | 11.22 | 904.8328 |
| Set -18 | Triacylglycerol         | UCD.Lipi d.230 | TG 56:3   | TG (56:3)                  | TG(18:0_18:1_20:2) | [M+N H4] <sub>+</sub>  | 11.22 | 930.8484 |
| Set -18 | Triacylglycerol         | UCD.Lipi d.231 | TG 56:4   | TG (56:4)                  | TG(18:0_18:1_20:3) | [M+N H4] <sub>+</sub>  | 10.9  | 928.8328 |
| Set -18 | Triacylglycerol         | UCD.Lipi d.232 | TG 56:5   | TG (56:5)                  | TG(18:0_18:1_20:4) | [M+N H4] <sub>+</sub>  | 10.78 | 926.8171 |
| Set -18 | Triacylglycerol         | UCD.Lipi d.233 | TG 56:6   | TG (56:6)                  | TG(18:1_18:1_20:4) | [M+N H4] <sub>+</sub>  | 10.34 | 924.8015 |
| Set -18 | Triacylglycerol         | UCD.Lipi d.234 | TG 56:7   | TG (56:7)                  | TG(18:1_18:2_20:4) | [M+N H4] <sub>+</sub>  | 9.968 | 922.7858 |
| Set -18 | Triacylglycerol         | UCD.Lipi d.243 | TG 58:4   | TG (58:4)                  | TG(18:1_18:2_22:1) | [M+N H4] <sub>+</sub>  | 11.25 | 956.8641 |
| Set -18 | Triacylglycerol         | UCD.Lipi d.244 | TG 58:6   | TG (58:6)                  | TG(18:0_18:1_22:5) | [M+N H4] <sub>+</sub>  | 10.67 | 952.8328 |
| Set -19 | Phosphatidylcholine     | UCD.Lipi d.147 | PC 38:5 B | PC (38:5) B                | PC(16:0_22:5)      | [M+H] <sub>+</sub>     | 5.168 | 808.5848 |
| Set -19 | Phosphatidylcholine     | UCD.Lipi d.151 | PC 40:5 B | PC (40:5) B                | PC(18:0_22:5)      | [M+H] <sub>+</sub>     | 5.806 | 836.6164 |
| Set -19 | Phosphatidylcholine     | UCD.Lipi d.152 | PC 40:6 A | PC (40:6) A                | PC(18:0_22:6)      | [M+H] <sub>+</sub>     | 5.151 | 834.6007 |
| Set -19 | Phosphatidylcholine     | UCD.Lipi d.153 | PC 42:5   | PC (42:5)                  |                    | [M+H] <sub>+</sub>     | 6.072 | 864.645  |
| Set -19 | Phosphatidylcholine     | UCD.Lipi d.154 | PC 42:6   | PC (42:6)                  |                    | [M+H] <sub>+</sub>     | 5.773 | 862.6311 |
| Set -19 | Phosphatidylcholine     | UCD.Lipi d.405 | PC 38:5 A | PC (38:5) A                | PC(18:1_20:4)      | [M+Ac -H] <sub>-</sub> | 5.107 | 866.59   |
| Set -19 | Phosphatidylcholine     | UCD.Lipi d.408 | PC 40:5 A | PC (40:5) A                | PC(18:0_22:5)      | [M+Ac -H] <sub>-</sub> | 5.74  | 894.62   |
| Set -19 | Phosphatidylcholine     | UCD.Lipi d.411 | PC 40:8   | PC (40:8)                  | PC(18:2_22:6)      | [M+Ac -H] <sub>-</sub> | 4.533 | 888.58   |
| Set -19 | Phosphatidylinositol    | UCD.Lipi d.460 | PI 38:4   | PI (38:4)                  | PI(18:0_20:4)      | [M-H] <sub>-</sub>     | 4.606 | 885.55   |
| Set -20 | Phosphatidylcholine     | UCD.Lipi d.158 | PC p-38:2 | PC (p-38:2) or PC (o-38:3) |                    | [M+H] <sub>+</sub>     | 6.212 | 798.6359 |
| Set -20 | Phosphatidylcholine     | UCD.Lipi d.165 | PC p-42:3 | PC (p-42:3) or PC (o-42:4) |                    | [M+H] <sub>+</sub>     | 7.224 | 852.6859 |
| Set -20 | Phosphatidylcholine     | UCD.Lipi d.421 | PC p-38:3 | PC (p-38:3) or PC (o-38:4) | PC(P-18:0_20:3)    | [M+Ac -H] <sub>-</sub> | 6.098 | 854.63   |
| Set -20 | Phosphatidylcholine     | UCD.Lipi d.424 | PC p-40:3 | PC (p-40:3) or PC (o-40:4) |                    | [M+Ac -H] <sub>-</sub> | 6.763 | 882.66   |
| Set -20 | Phosphatidylcholine     | UCD.Lipi d.425 | PC p-40:4 | PC (p-40:4) or PC (o-40:5) | PC(P-20:0_20:4)    | [M+Ac -H] <sub>-</sub> | 6.106 | 880.64   |
| Set -20 | Phosphatidylcholine     | UCD.Lipi d.426 | PC p-42:4 | PC (p-42:4) or PC (o-42:5) | PC(P-22:0_20:4)    | [M+Ac -H] <sub>-</sub> | 6.747 | 908.67   |
| Set -20 | Phosphatidylcholine     | UCD.Lipi d.427 | PC p-42:5 | PC (p-42:5) or PC (o-42:6) |                    | [M+Ac -H] <sub>-</sub> | 6.188 | 906.66   |
| Set -20 | Phosphatidylcholine     | UCD.Lipi d.428 | PC p-44:4 | PC (p-44:4) or PC (o-44:5) |                    | [M+Ac -H] <sub>-</sub> | 7.387 | 936.71   |
| Set -21 | Lysophosphatidylcholine | UCD.Lipi d.125 | LPC 20:4  | LPC (20:4)                 | LysoPC 20:4        | [M+H] <sub>+</sub>     | 1.205 | 544.3403 |
| Set -21 | Phosphatidylcholine     | UCD.Lipi d.146 | PC 38:4 B | PC (38:4) B                |                    | [M+H] <sub>+</sub>     | 6.146 | 810.6004 |

|         |                               |                |           |                              |                 |            |           |              |
|---------|-------------------------------|----------------|-----------|------------------------------|-----------------|------------|-----------|--------------|
| Set -21 | Lysophosphatidylet hanolamine | UCD.Lipi d.380 | LPE 20:4  | LPE (20:4)                   | LysoPE 20:4     | [M-H]-     | 1.3<br>13 | 500.2<br>8   |
| Set -21 | Phosphatidylcholine           | UCD.Lipi d.394 | PC 35:4   | PC (35:4)                    | PC(15:0_20:4)   | [M+Ac-H]-  | 4.7<br>65 | 826.5<br>6   |
| Set -21 | Phosphatidylcholine           | UCD.Lipi d.398 | PC 36:4 B | PC (36:4) B                  | PC(16:0_20:4)   | [M+Ac-H]-  | 5.0<br>74 | 840.5<br>8   |
| Set -21 | Phosphatidylcholine           | UCD.Lipi d.401 | PC 37:4   | PC (37:4)                    | PC(17:0_20:4)   | [M+Ac-H]-  | 5.3<br>9  | 854.5<br>9   |
| Set -21 | Phosphatidylcholine           | UCD.Lipi d.404 | PC 38:4 A | PC (38:4) A                  | PC(18:0_20:4)   | [M+Ac-H]-  | 5.7<br>06 | 868.6<br>1   |
| Set -21 | Phosphatidylcholine           | UCD.Lipi d.407 | PC 40:4   | PC (40:4)                    | PC(18:0_22:4)   | [M+Ac-H]-  | 6.1<br>72 | 896.6<br>4   |
| Set -22 | Phosphatidylethanol amine     | UCD.Lipi d.168 | PE p-34:1 | PE (p-34:1) or PE (o-34:2)   | PE(16:0_18:1)   | [M+H]<br>+ | 6.1<br>6  | 702.5<br>404 |
| Set -22 | Phosphatidylethanol amine     | UCD.Lipi d.438 | PE p-34:2 | PE (p-34:2) or PE (o-34:3)   | PE(P-16:0_18:2) | [M-H]-     | 5.6<br>4  | 698.5<br>1   |
| Set -22 | Phosphatidylethanol amine     | UCD.Lipi d.440 | PE p-36:2 | PE (p-36:2) or PE (o-36:3)   | PE(P-18:0_18:2) | [M-H]-     | 6.3<br>14 | 726.5<br>4   |
| Set -22 | Phosphatidylethanol amine     | UCD.Lipi d.441 | PE p-36:4 | PE (p-36:4) or PE (o-36:5)   | PE(P-16:0_20:4) | [M-H]-     | 5.5<br>23 | 722.5<br>1   |
| Set -22 | Phosphatidylethanol amine     | UCD.Lipi d.444 | PE p-38:3 | PE (p-38:3) or PE (o-38:4)   |                 | [M-H]-     | 6.4<br>8  | 752.5<br>6   |
| Set -22 | Phosphatidylethanol amine     | UCD.Lipi d.445 | PE p-38:4 | PE (p-38:4) or PE (o-38:5)   | PE(P-18:0_20:4) | [M-H]-     | 6.1<br>89 | 750.5<br>4   |
| Set -22 | Phosphatidylethanol amine     | UCD.Lipi d.446 | PE p-38:5 | PE (p-38:5) or PE (o-38:6)   | PE(P-18:0_20:5) | [M-H]-     | 5.5<br>82 | 748.5<br>3   |
| Set -22 | Phosphatidylethanol amine     | UCD.Lipi d.449 | PE p-40:5 | PE (p-40:5) or PE (o-40:6)   | PE(P-18:0_22:5) | [M-H]-     | 6.2<br>14 | 776.5<br>6   |
| Set -23 | Phosphatidylcholine           | UCD.Lipi d.161 | PC p-40:5 | PC (p-40:5) or PC (o-40:6)   |                 | [M+H]<br>+ | 5.7<br>4  | 820.6<br>215 |
| Set -23 | Phosphatidylcholine           | UCD.Lipi d.162 | PC p-40:6 | PC (p-40:6) or PC (o-40:7) A |                 | [M+H]<br>+ | 5.1<br>6  | 818.6<br>058 |
| Set -23 | Phosphatidylcholine           | UCD.Lipi d.163 | PC p-40:6 | PC (p-40:6) or PC (o-40:7) B |                 | [M+H]<br>+ | 5.6<br>25 | 818.6<br>058 |
| Set -23 | Phosphatidylcholine           | UCD.Lipi d.164 | PC p-40:7 | PC (p-40:7) or PC (o-40:8)   |                 | [M+H]<br>+ | 5.0<br>85 | 816.5<br>902 |
| Set -23 | Phosphatidylethanol amine     | UCD.Lipi d.447 | PE p-38:6 | PE (p-38:6) or PE (o-38:7)   | PE(16:0_22:6)   | [M-H]-     | 5.3<br>4  | 746.5<br>1   |
| Set -23 | Phosphatidylethanol amine     | UCD.Lipi d.450 | PE p-40:6 | PE (p-40:6) or PE (o-40:7)   | PE(P-18:0_22:6) | [M-H]-     | 5.9<br>98 | 774.5<br>4   |
| Set -23 | Phosphatidylethanol amine     | UCD.Lipi d.451 | PE p-40:7 | PE (p-40:7) or PE (o-40:8)   | PE(P-18:1_22:6) | [M-H]-     | 5.4<br>07 | 772.5<br>3   |
| Set -24 | Phosphatidylethanol amine     | UCD.Lipi d.166 | PE 36:4   | PE (36:4)                    | PE(16:0_20:4)   | [M+H]<br>+ | 5.2<br>5  | 740.5<br>184 |
| Set -24 | Phosphatidylcholine           | UCD.Lipi d.429 | PE 34:1   | PE (34:1)                    | PE(16:0_18:1)   | [M-H]-     | 5.8<br>31 | 716.5<br>2   |
| Set -24 | Phosphatidylethanol amine     | UCD.Lipi d.430 | PE 34:2   | PE (34:2)                    | PE(16:0_18:2)   | [M-H]-     | 5.3<br>32 | 714.5<br>1   |
| Set -24 | Phosphatidylethanol amine     | UCD.Lipi d.432 | PE 36:2   | PE (36:2)                    | PE(18:0_18:2)   | [M-H]-     | 5.9<br>89 | 742.5<br>4   |
| Set -24 | Phosphatidylethanol amine     | UCD.Lipi d.433 | PE 36:3   | PE (36:3)                    | PE(18:1_18:2)   | [M-H]-     | 5.3<br>99 | 740.5<br>2   |
| Set -24 | Phosphatidylethanol amine     | UCD.Lipi d.435 | PE 38:4 B | PE (38:4) B                  | PE(18:0_20:4)   | [M-H]-     | 5.8<br>81 | 766.5<br>4   |
| Set -24 | Phosphatidylethanol amine     | UCD.Lipi d.436 | PE 38:6   | PE (38:6)                    | PE(16:0_22:6)   | [M-H]-     | 5.0<br>74 | 762.5<br>1   |
| Set -25 | Phosphatidylcholine           | UCD.Lipi d.140 | PC 35:3   | PC (35:3)                    |                 | [M+H]<br>+ | 4.8<br>61 | 770.5<br>694 |
| Set -25 | Phosphatidylcholine           | UCD.Lipi d.141 | PC 36:3 B | PC (36:3) B                  | PC(18:1_18:2)   | [M+H]<br>+ | 5.1<br>84 | 784.5<br>848 |
| Set -25 | Phosphatidylcholine           | UCD.Lipi d.144 | PC 37:3   | PC (37:3)                    |                 | [M+H]<br>+ | 5.4<br>25 | 798.6<br>004 |
| Set -25 | Phosphatidylcholine           | UCD.Lipi d.397 | PC 36:3 A | PC (36:3) A                  | PC(18:1_18:2)   | [M+Ac-H]-  | 5.2<br>3  | 842.5<br>9   |
| Set -25 | Phosphatidylcholine           | UCD.Lipi d.402 | PC 38:2   | PC (38:2)                    | PC(20:0_18:2)   | [M+Ac-H]-  | 6.3<br>89 | 872.6<br>4   |
| Set -25 | Phosphatidylcholine           | UCD.Lipi d.403 | PC 38:3   | PC (38:3)                    | PC(18:0_20:3)   | [M+Ac-H]-  | 5.9<br>81 | 870.6<br>2   |

|         |                      |                |            |              |                        |                       |       |          |
|---------|----------------------|----------------|------------|--------------|------------------------|-----------------------|-------|----------|
| Set -25 | Phosphatidylinositol | UCD.Lipi d.459 | PI 38:3    | PI (38:3)    | PI(18:0_20:3)          | [M-H] <sup>-</sup>    | 4.9   | 887.57   |
| Set -26 | Triacylglycerol      | UCD.Lipi d.235 | TG 56:8    | TG (56:8)    | TG(18:1_18:2_20:5)     | [M+Na] <sup>+</sup>   | 9.769 | 925.7256 |
| Set -26 | Triacylglycerol      | UCD.Lipi d.236 | TG 56:9    | TG (56:9)    | TG(18:2_18:2_20:5)     | [M+Na] <sup>+</sup>   | 9.48  | 923.7057 |
| Set -26 | Triacylglycerol      | UCD.Lipi d.240 | TG 58:10   | TG (58:10)   | TG(18:2_18:2_22:6)     | [M+Na] <sup>+</sup>   | 9.396 | 949.7256 |
| Set -26 | Triacylglycerol      | UCD.Lipi d.245 | TG 58:8    | TG (58:8)    | TG(18:1_18:2_22:5)     | [M+N H4] <sup>+</sup> | 10.17 | 948.8015 |
| Set -26 | Triacylglycerol      | UCD.Lipi d.246 | TG 58:9    | TG (58:9)    | TG(18:2_18:2_22:5)     | [M+Na] <sup>+</sup>   | 9.794 | 951.7412 |
| Set -26 | Triacylglycerol      | UCD.Lipi d.249 | TG 60:11   | TG (60:11)   |                        | [M+N H4] <sup>+</sup> | 9.645 | 970.7859 |
| Set -27 | Sphingomyelin        | UCD.Lipi d.172 | SM d42:2   | SM (d42:2)   | SM(d18:1_24:1)         | [M+H] <sup>+</sup>    | 6.685 | 813.6873 |
| Set -27 | Sphingomyelin        | UCD.Lipi d.488 | SM d42:2 A | SM (d42:2) A | SM(d18:1_24:1)         | [M+Ac-H] <sup>-</sup> | 6.863 | 871.69   |
| Set -27 | Sphingomyelin        | UCD.Lipi d.489 | SM d42:3   | SM (d42:3)   | SM(d18:2_24:1)         | [M+Ac-H] <sup>-</sup> | 6.289 | 869.68   |
| Set -27 | Sphingomyelin        | UCD.Lipi d.492 | SM d44:2   | SM (d44:2)   |                        | [M+Ac-H] <sup>-</sup> | 7.528 | 899.72   |
| Set -28 | Cholesteroyl ester   | UCD.Lipi d.11  | CE 18:1    | CE (18:1)    | 18:1 Cholesteryl ester | [M+Na] <sup>+</sup>   | 10.88 | 673.5894 |
| Set -28 | Cholesteroyl ester   | UCD.Lipi d.13  | CE 18:3    | CE (18:3)    | 18:3 Cholesteryl ester | [M+Na] <sup>+</sup>   | 9.985 | 669.5581 |
| Set -28 | Cholesteroyl ester   | UCD.Lipi d.14  | CE 20:3    | CE (20:3)    | 20:3 Cholesteryl ester | [M+N H4] <sup>+</sup> | 10.49 | 692.634  |
| Set -28 | Cholesteroyl ester   | UCD.Lipi d.15  | CE 20:4    | CE (20:4)    | 20:4 Cholesteryl ester | [M+Na] <sup>+</sup>   | 10.16 | 695.5738 |
|         |                      |                |            |              |                        |                       |       |          |

2

3
